# Supplementary material for: Pretherapeutic factors predicting conversion surgery in unresectable pancreatic ductal adenocarcinoma: a retrospective study
Source: Research Square preprint supplement (doi:10.21203/rs.3.rs-3403698/v1), 2023-10-06
Supplement: Supplementary file 1 [file b7b29a3eac17f8582f53793b.xlsx]

## Sheet: Table 2
	Table 2 Clinical characteristics and outcome of 14 patients who underwent conversion surgery
	No.	Age (years)	Sex	Tumor location	UR status (UR factor)	First-line treatment	Duration (months)	RECIST	CA19–9 (U/mL) Before / After treatment	Findings of UR factor after treatment	Surgery	R	Evans grade	Post-operative therapy	Status	OS after initial treatment / after CS (months)
	1	72	M	Ph	LA (SMV)	mFFX	8.0	PR	1462 / 43	disappeared	PD	R0	IIb	S–1	Dead	65.9 / 57.8
	2	73	M	Ph	LA (CHA, PHA)	mFFX	3.7	SD	354 / 89	disappeared	DP-CAR	R0	IIa	None	Dead	44.5 / 40.8
	3	58	M	Ph	LA (Ao)	mFFX	6.8	PR	171 / 12	shrank	PD	R0	IIb	S–1	Alive	51.9 / 45.1
	4	56	F	Ph	LA (SMA, SMV)	mFFX	13.4	PR	5451 / 116	shrank	PD+PVR	R0	IV	None	Alive	56.0 / 42.7
	5	70	F	Ph	LA (CHA, PHA)	GnP	9.8	PR	228 / 20	shrank	PD+PVR +HAR	R0	IIb	S–1	Alive	49.6 / 39.8
	6	57	M	Ph	LA (Ao)	mFFX	6.8	PR	10890 / 26	disappeared	PD	R0	IIb	S–1	Alive	21.5 / 14.7
	7	72	M	Pt	M (eLN)	mFFX	2.8	SD	24469 / 3333	shrank	DP	R1	IIa	mFFX	Dead	66.5 / 63.8
	8	63	M	Pb	M (Per)	mFFX	4.5	SD	481 / 370	disappeared	DP	R0	IIa	S–1	Dead	35.1 / 30.6
	9	59	M	Pb	M (Per)	mFFX	24.0	PR	250 / 17	disappeared	DP	R0	IIa	mFFX	Dead	57.1 / 33.2
	10	63	F	Pb	M (Liver-Multi, Bone-Multi)	mFFX	23.3	PR	4379 / 81	disappeared	DP	R0	IIb	S–1	Alive	69.1 / 45.8
	11	79	M	Pht	M (Per)	GnP	4.6	SD	159 / 52	disappeared	TP	R1	IIa	S–1	Dead	20.2 / 15.6
	12	61	F	Ph	M (Liver-Multi)	mFFX	26.0	CR	10424 / 36	disappeared	PD+Hep	R0	IV	None	Alive	62.7 / 36.8
	13	62	M	Pb	M (eLN)	mFFX	9.1	PR	96 / 48	shrank	DP	R0	IIb	mFFX	Alive	23.6 / 14.5
	14	59	M	Pt	M (eLN)	mFFX	5.5	PR	13 / 12	shrank	DP	R0	IV	mFFX	Alive	23.8 / 18.3
	Abbreviations: UR unresectable, LA locally advanced lesion, SMV superior mesenteric vein, CHA common hepatic artery, PHA proper hepatic artery, Ao aorta, SMA superior mesenteric artery, M metastatic lesion, eLN extraregional lymph node, Per peritoneum, Multi multiple metastatic sites, mFFX modified FOLFIRINOX, GnP gemcitabine+nab-paclitaxel, RECIST response evaluation criteria in solid tumors, PR…
