# Supplementary material for: Pretherapeutic factors predicting conversion surgery in unresectable pancreatic ductal adenocarcinoma: a retrospective study
Source: Research Square preprint supplement (doi:10.21203/rs.3.rs-3403698/v1), 2023-10-06
Supplement: Supplementary file 2 [file ef53b6abf057d81800e42550.xlsx]

## Sheet: Table 5
	Table 5 Summary of the course of treatment for each parameter
		TP < 6.8	TP ≥ 6.8	p-value		NLR < 2.84	NLR ≥ 2.84	p-value		LMR <3.87	LMR ≥ 3.87	p-value
	Variables	(n = 85)	(n = 45)			(n = 51 )	(n = 79)			(n = 89)	(n = 41)
	First-line treatment, n			0.244				0.277				0.390
	mFFX/GnP/S–1/GEM/Other	51/24/0/8/2	25/15/2/3/0			30/16/2/3/0	46/23/0/8/2			53/24/1/10/1	23/15/1/1/1
	Adverse event, n (%)
	≥ Grade 3 toxicity	75 (88.2)	37 (82.2)	0.498		44 (86.3)	68 (86.1)	0.999		77 (86.5)	35 (85.4)	0.999
	Overall treatment time (months), median (IQR)	11.2 (4.8–18.3)	10.8 (3.7–20.0)	0.854		13.3 (7.8–23.0)	8.5 (2.8–17.5)	0.006		8.5 (3.2–16.8)	15.8 (8.7–28.5)	<0.001
	Abbreviations: TP total protein, NLR neutrophil-to-lymphocyte ratio, LMR lymphocyte-to-monocyte ratio, mFFX modified FOLFIRINOX, GnP gemcitabine+nab-paclitaxel, GEM gemcitabine, IQR interquartile range
